# Supplementary material
Source: Springer Nature journal article supplement (https://www.springermedizin.de/resource/supplementary/12933_2010_244_MOESM1_ESM.pdf/9539924)

**A**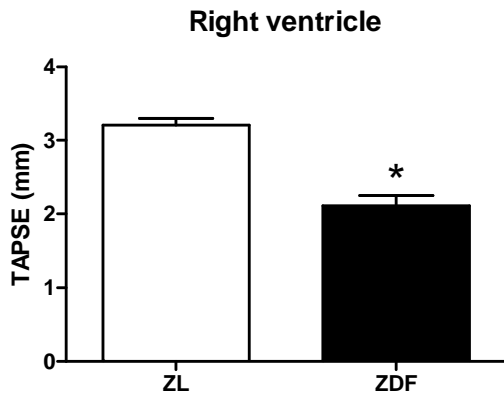**B**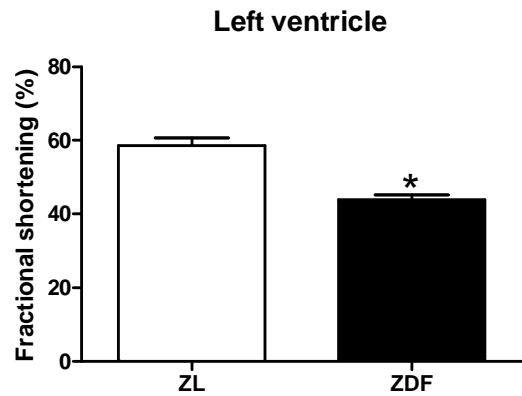**C**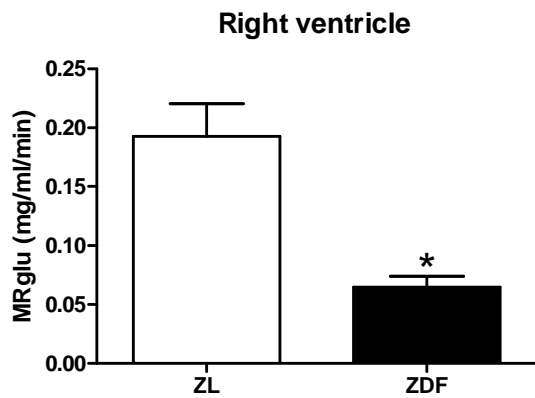**D**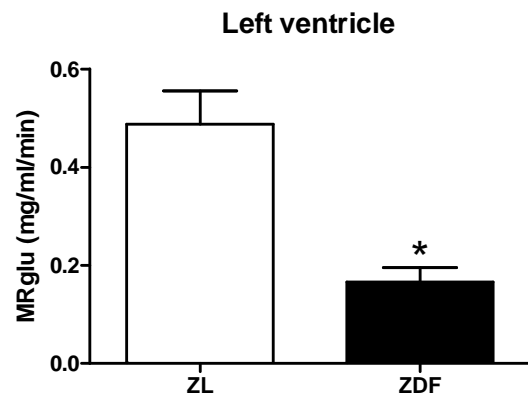**E**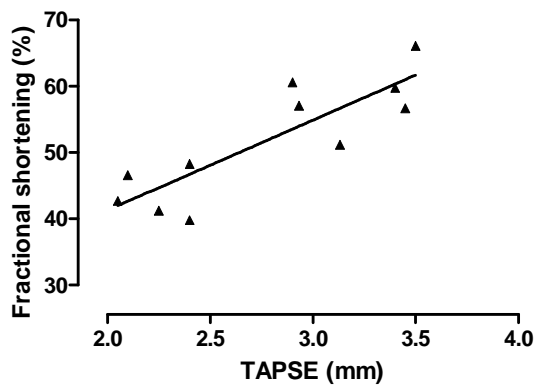**F**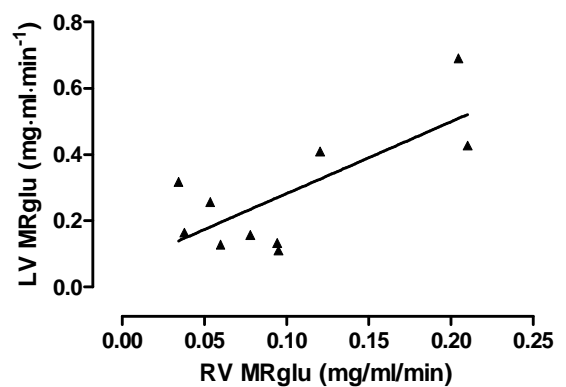

Supplement: MOESM1 [file 9539924]
